# Supplementary material
Source: Springer Nature journal article supplement (https://www.springermedizin.de/resource/supplementary/13058_2009_2521_MOESM3_ESM.pdf/9701598)

**A**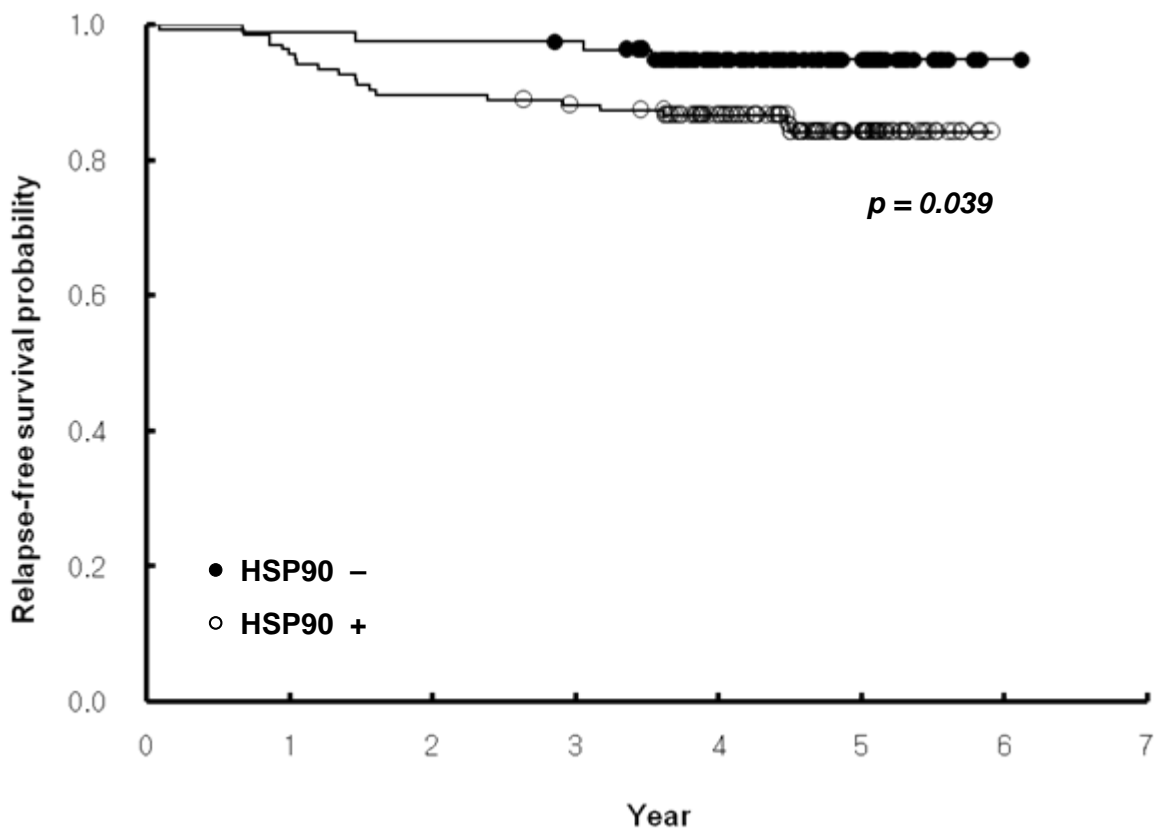**B**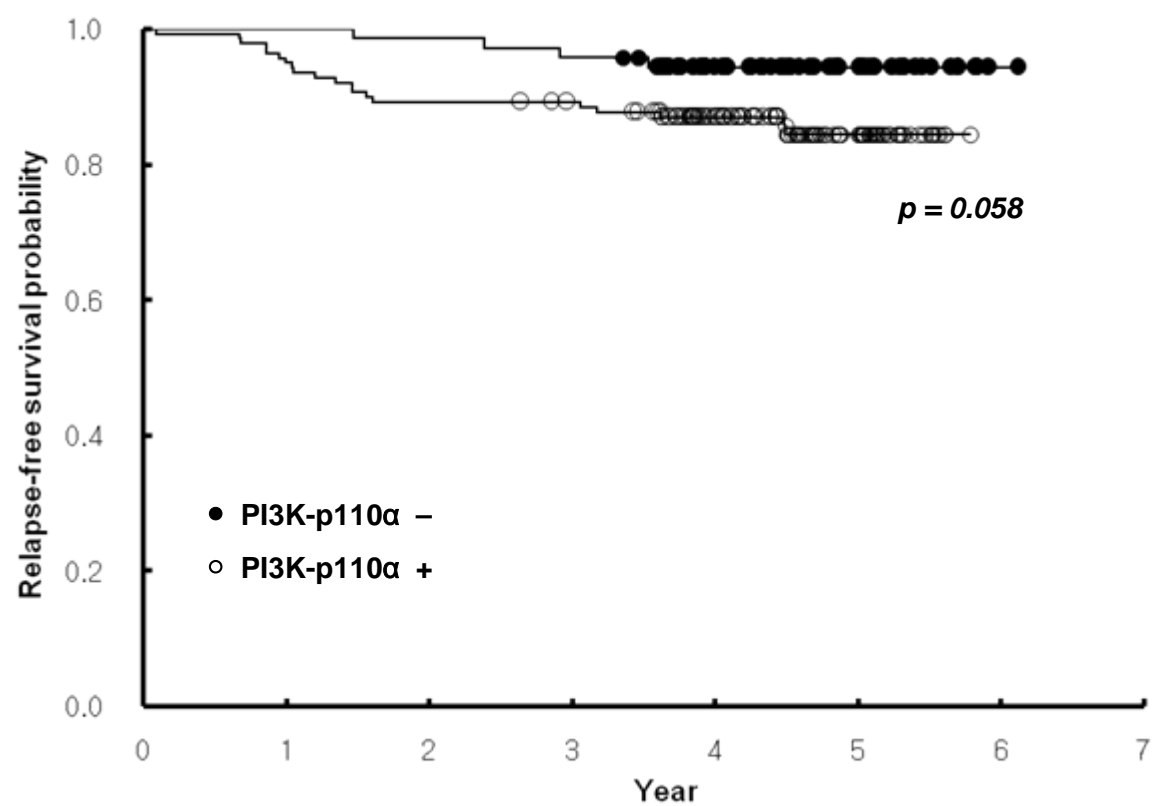

Supplement: MOESM3 [file 9701598]
